1 **Fast, 3D isotropic imaging of whole mouse brain using multi-**  
2 **angle-resolved subvoxel SPIM**

3 Jun Nie<sup>1+</sup>, Sa Liu<sup>1+</sup>, Tingting Yu<sup>2,3+</sup>, Yusha Li<sup>2</sup>, Junyu Ping<sup>1</sup>, Peng Wan<sup>2</sup>, Fang Zhao<sup>1</sup>,  
4 Yujie Huang<sup>4</sup>, Wei Mei<sup>4</sup>, Shaoqun Zeng<sup>2,3</sup>, Dan Zhu<sup>2,3\*</sup> and Peng Fei<sup>1,2\*</sup>

5 <sup>1</sup> School of Optical and Electronic Information, Huazhong University of Science and  
6 Technology, Wuhan, 430074, China.

7 <sup>2</sup> Britton Chance Center for Biomedical Photonics, Wuhan National Laboratory for  
8 Optoelectronics, Huazhong University of Science and Technology, Wuhan, 430074,  
9 China.

10 <sup>3</sup>MoE Key Laboratory for Biomedical Photonics, Huazhong University of Science and  
11 Technology, Wuhan, 430074, China

12 <sup>4</sup> Department of Anesthesiology, Tongji Hospital, Tongji Medical College, Huazhong  
13 University of Science and Technology, Wuhan, 430030, China

14

15

16 **Abstract**

17 The recent integration of light-sheet microscopy and tissue-clearing has facilitated an  
18 important alternative to conventional histological imaging approaches. However, the *in*  
19 *toto* cellular mapping of neural circuits throughout an intact mouse brain remains highly  
20 challenging, requiring complicated mechanical stitching, and suffering from  
21 anisotropic resolution insufficient for high-quality reconstruction in three dimensions.

22 Here, we propose the use of a multi-angle-resolved subvoxel selective plane  
23 illumination microscope (Mars-SPIM) to achieve high-throughput imaging of whole  
24 mouse brain at isotropic cellular resolution. This light-sheet imaging technique can  
25 computationally improve the spatial resolution over six times under a large field of view,

26 eliminating the use of slow tile stitching. Furthermore, it can recover complete  
27 structural information of the sample from images subject to thick-tissue  
28 scattering/attenuation. With Mars-SPIM, we can readily obtain a digital atlas of a  
29 cleared whole mouse brain ( $\sim 7 \times 9.5 \times 5$  mm) with an isotropic resolution of  $\sim 2$   $\mu\text{m}$  (1  
30  $\mu\text{m}$  voxel) and a short acquisition time of 30 minutes. It provides an efficient way to  
31 implement system-level cellular analysis, such as the mapping of different neuron  
32 populations and tracing of long-distance neural projections over the entire brain. Mars-  
33 SPIM is thus well suited for high-throughput cell-profiling phenotyping of the brain  
34 and other mammalian organs.

35

## 36 **Introduction**

37 The comprehensive understanding of complex cellular connections in the whole  
38 mammalian brain is one of the fundamental challenges in neuroscience. To unravel the  
39 various neuronal profiles of different physiological functions in the whole brain, three-  
40 dimensional (3-D) high-resolution imaging is required over a mesoscale sized volume<sup>1,2</sup>.  
41 However, creating such a large-scale brain dataset has posed a big challenge for current  
42 3-D optical microscopy methods, all of which show relatively small optical  
43 throughputs<sup>3-5</sup>. Furthermore, light scattering and attenuation are outstanding issues for  
44 the turbid tissues that limit the extraction of signals from deep brain. To address these  
45 issues, 3-D tile stitching combined with brain sectioning has been a popular strategy for  
46 obtaining mammalian brain atlases, which can be a meaningful platform for mapping  
47 neuronal populations, activities, or connections over the entire brain<sup>6</sup>. For example,

48 sequential two-photon (STP) microscopy can three-dimensionally image the brain at  
49 subcellular high resolution<sup>7-15</sup>, but at the cost of long acquisition times of up to several  
50 days and a high-maintenance system setup. The advent of light-sheet fluorescence  
51 microscopy<sup>16-22</sup> (LSFM) in conjunction with tissue-clearing<sup>23-28</sup> eliminates the need for  
52 complicated mechanical slicing of samples by instead applying nondestructive optical  
53 sectioning. Although LSFM still needs repetitive image stitching to achieve high lateral  
54 resolution over a large field of view (FOV), its use of wide-field detection results in  
55 higher imaging speeds compared with the point-by-point scanning of epifluorescence  
56 methods. A few well-known derivations of LSFM, for example, selective plane  
57 illumination microscopy (SPIM), have recently been used for mouse brain imaging with  
58 balanced speed and spatial resolution. However, the axial extent of the plane  
59 illumination in SPIM has to be compromised to its lateral illumination FOV so that an  
60 anisotropic axial resolution (typically of 5 to 20  $\mu\text{m}$ , depending on the size of the mosaic  
61 patch needing to be illuminated) can be yielded for whole-brain scale imaging<sup>29,30</sup>. As  
62 a result, it is difficult to resolve fine neuronal structures and connections in three  
63 dimensions, as can be achieved by conventional epifluorescence methods such as  
64 micro-optical sectioning tomography<sup>13,14</sup> (MOST) and STP excitation microscopy<sup>10-12</sup>.  
65 Furthermore, even with the much larger imaging depth enabled by tissue clearing<sup>30-33</sup>,  
66 photon absorption and scattering still occur in the clarified tissues of whole mammalian  
67 organs. These cause noticeable deterioration of signals from deep tissues. Recently,  
68 multi-view fusion techniques<sup>34-36</sup>, which have previously been used in the imaging of  
69 small live embryos<sup>37,38</sup>, have also been applied to excised mouse brains. These can

70 improve the relatively low axial resolution and suppress deep tissue scattering<sup>39</sup>.  
71 However, for the direct imaging of mesoscale intact organs, the lateral resolution of  
72 SPIM systems, being 5  $\mu\text{m}$  at its best, is insufficient to visualize single cells under a  
73 large FOV of over 5 mm. In such circumstances, multi-view techniques cannot  
74 overcome the lateral resolution limit determined by the detection optics. However, if  
75 multi-view techniques were to be combined with repetitive image stitching, the  
76 throughput advantage of LSFM would be significantly reduced, as well as the photon  
77 utility.

78 Here, we present a whole-brain mapping pipeline, termed multi-angle-resolved  
79 subvoxel SPIM (Mars-SPIM), which can image the whole mouse brain at an isotropic  
80 voxel resolution of  $\sim 1 \mu\text{m}$  with a high throughput rate of half an hour per brain. This  
81 imaging strategy combines our sub-voxel-resolving computation<sup>40</sup> with multi-view  
82 Bayesian deconvolution<sup>36,41</sup> to achieve fast and accurate reconstruction of a whole brain  
83 with isotropically improved resolution. Unlike conventional whole-brain imaging  
84 methods that use stepwise z-scanning and 3-D tile stitching, Mars-SPIM directly  
85 records low-resolution whole-brain images using a continuous non-axial scanning  
86 method. This unique scanning mode provides a high acquisition rate, and meanwhile  
87 encrypts sub-resolution shifts into raw images, which could be further processed by the  
88 multi-view sub-voxel-resolving computation. Furthermore, this computation pipeline  
89 is parallelized with multi-GPUs to achieve a high reconstruction throughput  
90 (gigavoxels per minute) that matches the fast image acquisition. By reconstructing a  
91 single-cell-resolution whole-brain atlas, we demonstrate successful brain-wide tracing

92 of single neural projections and the counting of different neuronal populations over the  
93 entire brain. Mars-SPIM shows spatial-temporal performance superior to the other  
94 available techniques for large-scale cell profiling, where sample size, spatial resolution,  
95 and imaging throughput are all highly valued. It is therefore suitable for system-level  
96 cellular analysis of brain or other whole organs.

97

## 98 **Results**

### 99 **Mars-SPIM setup and characterization**

100 We developed a Mars-SPIM system, with a low-profile setup with wide-FOV  
101 illumination and detection sufficient to cover the entire mouse brain (see Methods and  
102 Supplementary Figures 1 and 2). Under a certain view, the brain sample to be imaged  
103 is continuously scanned across the laser-sheet along a non-axial direction. The camera  
104 is synchronized to sequentially record a stack of plane images with a step-size  
105 significantly smaller than the laser-sheet thickness. This non-axial scanning mode of  
106 the Mars-SPIM encodes the low-resolution (LR) raw image stack with sub-voxel spatial  
107 shifts, which are then used to reconstruct high-resolution (HR) images through the  
108 application of an sub-voxel-resolving (SVR) algorithm (Supplementary Figure 3). The  
109 sample is then rotated along the y-axis and non-axially imaged under multiple views  
110 (Figure 1a). After the SVR computation has generated a series of HR images with  
111 anisotropic volumes for all the views, a neuron-feature-based registration followed by  
112 a multi-view Bayesian deconvolution (MVD) procedure is applied to accurately align  
113 the multiple SVR volumes, compute their conditional probabilities, and finally produce

114 an output with recovered complete signals and isotropic super-resolution in three  
115 dimensions. This SVR-MVD fused computation pipeline is further illustrated in Figure  
116 1b and Supplementary Figure 3.

117 We used fluorescent microbeads with a diameter of  $\sim 500$  nm as a point source to  
118 characterize the Mars-SPIM system (Figure 1c and Supplementary Figure 4). For each  
119 view, the microbeads were scanned by a  $\sim 12$ - $\mu\text{m}$  thick (full width at half maximum  
120 value; FWHM) laser-sheet with 280 nm step-size, and were detected by a  $4\times/0.16$   
121 objective. This non-axial scanning process (10 degrees to the x-z and y-z planes)  
122 generated sub-resolution shifts of 48 and 272 nm in the lateral and axial directions  
123 respectively. Thirty-four groups of LR image volumes representing the standard  
124 resolution of the system optics (voxel size:  $1.625 \times 1.625 \times 4.5 \mu\text{m}$ ) were extracted  
125 from the raw image sequence to compute the HR images. The raw LR, single-view  
126 SVR, conventional MVD, and SVR-MVD results are compared in Figure 1c. The line  
127 intensity profiles of the resolved beads are plotted in Figure 1d and e, to indicate the  
128 lateral and axial resolutions of these methods. The achievable lateral and axial FWHMs  
129 of the SVR-MVD are improved from  $\sim 4.2 \mu\text{m}$  and  $12 \mu\text{m}$  in the raw image to isotropic  
130 values of  $\sim 1.4 \mu\text{m}$ , which are superior to both the single-view SVR ( $1.7 \mu\text{m}$  and  $4.5 \mu\text{m}$ )  
131 and conventional MVD (isotropic  $3.4 \mu\text{m}$ ).

132 We then demonstrated the imaging capability of the Mars-SPIM using clarified  
133 brain tissue from a transgenic mouse (*thy1-GFP-M*). The brain sample was optically  
134 sectioned by a  $15$ - $\mu\text{m}$  laser-sheet and imaged using a  $4\times/0.28$  objective and a high-  
135 speed camera (Hamamatsu Flash 4.0 v2) at a rate of 50 frames per second. The brain

136 sample was translated at a non-axial step-size of 280 nm ( $4 \times 4 \times 2$  enhancement) and  
137 rotated 45 degrees for each new view. Eight different view image stacks were rapidly  
138 recorded in a total time of around 20 minutes. The raw image volume of each view was  
139 acquired at the limited resolution of the system optics, and hence the densely-packed  
140 neuronal fibers remained unresolvable (Figure 2a). The SVR procedure for each view  
141 was then started with an initial guess, which was simply a  $\times 4$  interpolation of one of  
142 the subdivided LR groups, and the process iteratively converged to the HR solution  
143 (data not shown). Then, in the multi-view registration step, the neuronal cell bodies  
144 were recognized as features to establish correspondences, instead of the beads. This  
145 cell-based registration was verified to be as accurate as the bead-based one  
146 (Supplementary Figures S5 and 6), while at the same time producing a cleaner  
147 visualization (Supplementary Videos 1 and 2). Figure 2c shows the final Mars-SPIM  
148 result with a reconstructed voxel size of 0.4  $\mu\text{m}$ . This result is further compared with  
149 conventional multiview SPIM (Mv-SPIM, Figure 2b), high magnification SPIM  
150 ( $20\times/0.45$  with  $\sim 6.5\text{-}\mu\text{m}$  laser-sheet, Figure 2d) and confocal microscopy ( $10\times/0.4$ ,  
151 Figure 2e). The linecuts through the transverse plane of the neuron dendrite (Figure 2a-  
152 d) using each method reveal significantly improved resolution with the Mars-SPIM,  
153 which surpasses both the  $20\times$ -SPIM result with anisotropic resolution in the  
154 longitudinal direction, and the Mv-SPIM result with insufficient overall resolution  
155 (Figure 2g). With the substantially enhanced isotropic resolution, two giant pyramidal  
156 neurons could be finely segmented across a large volume ( $\sim 400$  gigavoxels for the  
157 entire sample), as shown by the blue and red colors in Figure 2f and g. We note that

158 besides the increased space-bandwidth product (SBP; volume size divided by  
159 resolution)<sup>4,5</sup>, the Mars-SPIM also shows an improvement in the signal-to-noise ratio  
160 (SNR), which can help to discern weak signals from the strong background signal of  
161 thick tissue (Supplementary Figure 7). Furthermore, we tested different numbers of  
162 views to verify that eight views formed a good balance between the data size/throughput  
163 and performance (Supplementary Figure 8). Mars-SPIM can thus be considered as a  
164 light-sheet microscope that is less vulnerable to spherical aberration and light scattering  
165 in thick tissue, and combines a large FOV with high-resolution advantages that are  
166 difficult to achieve with previous methods. From another perspective, the stitching-free  
167 continuously-scanning mode exhibits a higher acquisition throughput than other  
168 stitching-based methods, as well as lower photobleaching. In Figure 2h, we rate the  
169 imaging performances of standard 4× SPIM, 20× SPIM, 10× confocal and our 4× Mars-  
170 SPIM through comparisons of the system complexities, imaging speeds, photo-  
171 bleaching rates, and spatial resolutions (also see Supplementary Figure 9 and  
172 Supplementary Table 1). Compared with the confocal microscope (10×), the Mars-  
173 SPIM gains advantages in imaging depth and axial resolution (Supplementary Figures  
174 10 and 11). Besides the well-balanced volumetric resolution, the Mars-SPIM yields the  
175 highest effective throughput at ~400 gigavoxels SBP in a 20-minute acquisition. Mars-  
176 SPIM also eliminates the need for mechanical stitching, slicing, high-maintenance  
177 optics, and precisely-modulated illumination, instead using a relatively simple light-  
178 sheet setup and fast GPU-based computation to address the general challenge of high-  
179 throughput high-resolution 3-D microscopy that was originally coupled to the physical



180 limitations of a system's optics. In the following whole-brain applications, this  
181 underlying robustness allows the Mars-SPIM prototype to image the entire thick organ  
182 with high spatial-temporal performance while maintaining a simple set-up.

183

#### 184 **High-throughput, *in toto* imaging of whole mouse brain at high resolution**

185 An 8-week-old whole mouse brain (*Tg: thy1-GFP-M*) was optically cleared using the  
186 a-uDISCO method<sup>42</sup>, before being imaged by the Mars-SPIM. The brain shrank in size  
187 from  $\sim 9.3 \times 14 \times 7.1$  mm to  $\sim 7 \times 9.5 \times 5$  mm after clearing (Figure 3a). Despite the use  
188 of tissue clearing, light attenuation/scattering from deep tissue remained a big challenge  
189 for the complete imaging of the whole brain (Supplementary Figure 13). However,  
190 brain-wide biomedical applications such as cell population mapping and neuronal  
191 projection tracing intrinsically need high spatial resolution across a large area, hence  
192 highlighting the significance of the Mars-SPIM method. Experimentally, the whole  
193 brain was imaged under a low-magnification setup of 25- $\mu$ m light-sheet illumination  
194 plus  $\times 2.2$  wide-field detection, and therefore only required to be stitched twice because  
195 of the large FOV. The brain was then rotated for each view of the nonaxial scanning  
196 (950 nm step-size, 5500 frames in 110 s), with a total of 16 views of raw stacks being  
197 rapidly obtained in around half an hour. Using the above mentioned SVR-MVD  
198 procedure, we successfully reconstructed the entire brain at an isotropic voxel size of  
199 0.975  $\mu$ m. Figure 3b shows a reconstructed volume rendering of the whole brain (400  
200 gigavoxels, MIP mode). The horizontal planes (x-y) at different depths (Figure 3c-e)  
201 and coronal planes (x-z) at different heights (Figure 3f-h) are extracted from the

202 reconstructed brain volume and compared with the conventional SPIM results. It is  
203 obvious that the Mars-SPIM shows remarkable improvements in resolution, contrast,  
204 and signal integrity. Vignettes of high-resolution Mars volumes of five selected areas  
205 (Figure 4a), including the left and right cortex, hippocampus, thalamus and cerebellum,  
206 are shown in Figure 4b-f respectively. The strong efficacy of the neural signal recovery,  
207 as well as the resolution enhancement by Mars-SPIM, are further illustrated in  
208 Supplementary Figure 13, in which a full coronal plane acquired by conventional SPIM  
209 and experiencing strong scattering from both illumination (x) and emission (z) is  
210 compared with the same plane acquired by Mars-SPIM. By quickly creating a cellular-  
211 resolution brain atlas encompassing 400 gigavoxels across a large volume of over 300  
212 mm<sup>3</sup> (post-computation time ~12 hours), the Mars-SPIM enables high-throughput  
213 analysis of massive neurons at the whole brain level, which are otherwise spatially or  
214 temporally more challenging using regular light sheet microscopes. (Figure 2h,  
215 Supplementary Figure 14).

216

### 217 **Whole-brain visualization and segmentation**

218 Using the Mars-SPIM reconstruction of the whole brain (8-week-old mouse), we  
219 explored the neuronal cyto-structures in various brain sub-regions, and precisely traced  
220 the interregional long-distance projections of neurons which is crucial for  
221 understanding the functionality of the brain (Figure 5, Supplementary Videos 3, 4 and  
222 5). After the Mars-SPIM reconstruction of the whole brain, we used an adaptive  
223 registration method<sup>43-45</sup> to three-dimensionally map the brain to the standard Allen

224 Brain Atlas (ABA). The brain was first re-orientated from horizontal view to coronal  
225 view and automatically pre-aligned to the ABA using Elastix<sup>43</sup>. This pre-aligned brain  
226 was then resized into LR and HR groups, as shown in Figure 5a step 2. Next, we finely  
227 registered the LR group to the ABA, and obtained the transform correspondence (step  
228 3), which was then applied to the HR group to obtain a registered and transformed HR  
229 brain (step 4). This mapped brain atlas was finally visualized in Imaris to facilitate the  
230 neuron analysis (Figure 5a).

231 With the creation of the atlas, the neurons localized to different encephalic regions  
232 (such as cortex, hippocampus, cerebellum and midbrain) could be identified (Figure  
233 5b), and *in toto* mapped out at a whole-brain scale (Figure 5c). Then, the neuron  
234 population and the density in different encephalic regions were quantified by  
235 calculating the volume of the regions and counting the identified cell bodies within  
236 them (Figure 5d). The results show that among the 12 primary regions, the hippocampus  
237 formation had the highest neuron density of 4600 cells/mm<sup>3</sup>, which is consistent with  
238 prior knowledge<sup>46</sup>. It should be noted that the current low-number counting results were  
239 obtained using a *thy1-GFP-M* transgenic mouse, in which GFP signal is expressed by  
240 less than 10% of all motor axons, retinal ganglion cells, lumbar dorsal root ganglions,  
241 and cortex<sup>47</sup>. According to the registered HR images, we could trace the neuron  
242 projections passing through different brain regions. The whole brain data were  
243 volumetrically rendered with several sub-regions being segmented in different colors.  
244 Figure 5e shows horizontal and coronal views of the volume renderings. The  
245 trajectories of six long-distance (LD) projection neurons were successfully traced and

246 annotated in the digital whole-brain, revealing how they were broadcast across the  
247 different regions of the brain (Figure 5f). Given the fact that this quantitative analysis  
248 was implemented using a *thy1-GFP-M* mouse with a large number of neurons being  
249 labeled, this procedure should be more efficient if the mouse brain were to be labelled  
250 more specifically, such as with a virus tracer. Through the above mentioned  
251 demonstration, we have shown the potential of our strategy for imaging-based  
252 quantifications of the whole-brain, or other whole-organ-level analyses, which are  
253 crucial for a variety of applications in histology, pathology, and neuroscience.

254

## 255 **Discussion**

256 Mars-SPIM can computationally surpass the resolution limit of a regular light-sheet  
257 microscope and suppress the light scattering/attenuation that often exists in thick-tissue  
258 imaging. Unlike mechanical slicing and tile stitching, which require complicated  
259 operations, this strategy provides a simple and efficient way to achieve high-throughput  
260 whole-brain mapping at a single-cell resolution. The use of simple optics in the Mars-  
261 SPIM offers an ultra-large FOV of hundreds of mm<sup>3</sup>, facilitating direct coverage of the  
262 whole brain (or other whole organs). Its stitching-free continuous scanning mode  
263 greatly reduces the acquisition time for such tissue volumes from several hours with  
264 traditional methods to several minutes. Complementing the rapid data acquisition, a  
265 highly GPU-parallelized SVR-MVD computation flow is followed to reconstruct the  
266 super-resolved 3-D brain atlas at a high throughput time of a few hours. In our  
267 demonstration, the quickly reconstructed digital mouse brain acquired by Mars-SPIM

268 presents an isotropic cellular resolution ( $\sim 2 \mu\text{m}$ ) with three- to ten-fold improvement in  
269 resolution compared with conventional macro-view SPIM. It should also be noted that  
270 this Mars-SPIM strategy can be applied to most existing light-sheet microscopes using  
271 a simple retrofit, and can expand the optical throughput for fast, high-resolution  
272 mapping of whole biological specimens without necessarily increasing the system  
273 complexity. Thus, it can be characterized as a high-throughput 3-D imaging method  
274 with a simple and cost-effective setup. Furthermore, the Mars-SPIM imaging in  
275 conjunction with efficient brain registration can form a pipeline for creating an isotropic  
276 whole-brain atlas, with which brain-wide quantitative analysis (e.g., neuron populations,  
277 densities, and long-distance neuronal projections) could be easily implemented. In  
278 combination with recent advances in specimen preparation techniques, such as  
279 fluorescence-friendly tissue clearing, virus-based sparse labelling and transgenic  
280 animal models, the Mars-SPIM could be more powerful in enabling various cellular  
281 analyses of neural systems. Besides whole-brain mapping, we believe the Mars-SPIM  
282 method could improve the efficiency of imaging other mammalian organs, such as lung,  
283 kidney, and heart, and be of benefit for a wide variety of biomedical applications.  
284 Furthermore, its ability to readily accomplish cellular imaging of mesoscale organisms  
285 at hundreds of gigavoxel SBP renders Mars-SPIM a widely applicable tool for cellular  
286 profiling, phenotyping, or sample screening assays in histology, pathology, and  
287 developmental biology, in which both large-scale statistics and cellular details are often  
288 desired for whole-tissue-level study.

289

## 290 **Methods**

### 291 **Mars-SPIM imaging setup**

292 A fiber-coupled DPSS laser (CNI laser, 488 nm, single-mode fiber) was used for  
293 excitation source. The laser was first collimated into a Gaussian beam with diameter  
294  $\sim 3.3$  mm (Thorlabs, F280FC-A). Then a sandwich structure containing a convex lens  
295 ( $f = 50$  mm, Thorlabs, AC254-050-A) and two cylindrical lenses ( $f = 30$  mm and 150  
296 mm, Thorlabs, LJ1212L1, LJ1934L1) was designed to transform the round beam into  
297 an elliptical shape. The expansion ratio in short (x) and long (y) axis was  $\times 0.6$  and  $\times 3$ ,  
298 respectively, forming an elliptical beam with size of 10 by 2 mm (Supplementary Figure  
299 2). A pair of adjustable mechanical slits (0-8 mm aperture, Thorlabs, VA100C/M) were  
300 placed orthogonally to further truncate the beam and thereby tune the height and  
301 thickness of the laser-sheet. The modulated elliptical beam was equally split into two  
302 parts via a 50/50 prism (Thorlabs, CCM1-BS014/M), to form two opposite beams,  
303 which will be further used to illuminate the sample from dual sides. A dual-side optical  
304 sectioning of the whole brain sample was finally formed by using two symmetric  
305 combination of cylindrical lens (Thorlabs, LJ1695RM) and illuminating objective  
306 (Olympus, 4 $\times$ /0.10). The laser sheet had a widely tunable range from 5 to 50  $\mu$ m in  
307 thickness and 0.5 to 10 mm in height.

308 Unlike regular detection setup applied in SPIM, we specially used a 4 $\times$ /0.28 objective  
309 in conjunction with an ED Plan 1 $\times$  tube lens to construct an infinity-corrected, wide-  
310 field, and large-aperture detection path (equivalent magnification  $\times 2.2$ ). Compared to  
311 the conventional infinity-corrected low-magnification detection, e.g, 2 $\times$  Nikon

312 objective plus 200 mm focal length tube lens, this setup can collect much more  
313 fluorescent signals under a large illumination range due to the larger aperture  
314 (Supplementary Figure S9). A four-degree-of-freedom motorized stage (x, y, z  
315 translation and rotation around the y-axis, Thorlabs and Phidgets Inc.) integrated with  
316 a pair of customized tilting plates (10° inclined surface) was constructed for sample  
317 mounting, rotating at multiple angle of views, and scanning across the laser sheet in an  
318 off-detection-axis direction (Supplementary Figure S1). A digital camera (Hamamatsu  
319 Orca Flash 4.0 v2 plus, or Andor Zyla 5.5) continuously records the images from the  
320 consecutively illuminated planes at a high speed up to 50 full frames per second.

321

## 322 **Sample preparation**

323 Tissue clearing is an essential procedure before imaging. Here we used a-uDISCO  
324 method to clear the brains of 8-weeks *thy1-GFP* mice (line M, Jackson Laboratory).  
325 In the brain block experiment, to preserve the fluorescence and avoid photobleaching,  
326 the cleared brain was embedded into a specific formulated resin<sup>48</sup>, the refractive index  
327 of which was equal to the index-matched immersion. For conducting bead-based  
328 registration, fluorescent beads (Lumisphere, 1%w/v, 500 nm, SiO<sub>2</sub>) were mixed around  
329 the sample in the resin. 10 µl of bead stock solution was centrifuged at 1200 rpm for 3  
330 minutes with the water-phase supernatant being removed and replaced with 20 µl  
331 methanol. Then the methanol-based bead solution was mixed into the resin to form  
332 the bead-resin mixture, which was finally poured into a tube mold with the brain  
333 specimen embedded. The tube containing beads, resin and sample was stored in a dark

334 place for 2-3 days till it was solidified for LSFM imaging. For the cell body-based  
335 registration of brain block, the sample was directly embedded in the resin without the  
336 procedure of mixing bead. For whole brain imaging, the brain was dissected with  
337 keeping an ~5 mm long spinal cord (Figure 3a). After optical clearing, the sample could  
338 be mounted to the stage via connecting the harden spinal cord with the beam shaft of  
339 the rotating motor (Figure 3a).

340

### 341 **Multi-view imaging acquisition**

342 The brain samples were scanned under eight views. Each times of scanning was  
343 executed along a non-axial direction with a step-size significantly smaller than the  
344 thickness of light sheet. Under continuous scanning mode, this value was determined  
345 by the scanning velocity and camera frame rate, varying from 0.3  $\mu\text{m}$  (for brain block)  
346 to 1  $\mu\text{m}$  (for whole brain), depending on the optical configuration. The corresponding  
347 acquisition time for total 8 views was around 20 and 30 minutes, respectively. The high  
348 magnification SPIM images for comparison were obtained using 20 $\times$  objective plus a  
349 thinner light sheet of ~6.5  $\mu\text{m}$ . Finally, hundreds of gigabyte raw images were  
350 transferred to a high-capacity SSD RAID of the workstation via the camera link cable.

351

### 352 **SVR-MVD reconstruction**

353 SVR computation combined multi-view Bayesian deconvolution<sup>41</sup> was implemented to  
354 achieve isotropic high-resolution reconstruction of whole mouse brain. Under each  
355 view, a series of low-resolution image stacks were extracted from the oversampled raw



356 data<sup>40</sup>. All low-resolution stacks were correlated with each other in term of sub-voxel-  
357 resolution displacements and spatially registered to a high-resolution image stack with  
358 an oblique, sub-voxel shift. The multiple low-resolution images and an initial guess of  
359 high-resolution image were input into a maximum-likelihood-estimation based  
360 computation model to iteratively obtain a converged high-resolution image. This high-  
361 resolution estimate was corrected into the final reconstruction by a voxel re-alignment,  
362 which recovers the accurate shape of the sample. In practice, the SVR algorithm was  
363 applied in parallel to quickly obtain resolution-enhanced results for all the views.

364 After SVR processing for each view, the resolution-enhanced results were regarded as  
365 input for multi-view reconstruction in Fiji program. Similar with the bead-based  
366 registration method<sup>36</sup>, here the neuron cell bodies were recognized as fiducial makers  
367 to establish the correspondences between each two views. Then all the SVR views  
368 could be precisely registered using these correspondences. A multi-view Bayesian  
369 deconvolution<sup>36</sup> was applied at the final step to rationally gather the information from  
370 all the registered SVR views, and generate an output image with containing complete  
371 sample information as well as enhanced isotropic resolution. An improved Richardson-  
372 Lucy deconvolution was used to obtain the final deconvolved image with faster  
373 convergence. Furthermore, this SVR-MVD computation procedure could be highly  
374 parallelized with GPU-based acceleration. The whole processing time for an entire  
375 brain atlas (400 gigavoxels) was ~12 hours on a workstation equipped with dual E5-  
376 2630 CPU, quad Geforce 1080Ti GPU and 1T memory. This time consumption could  
377 be further reduced with employing more powerful computation units.

378

### 379 **Confocal microscope and UltraMicroscope imaging**

380 The confocal images are taken by Olympus FV3000 under 10× objective, with a voxel  
381 size of  $0.8 \times 0.8 \times 2 \mu\text{m}$  at 0.5 Hz (Supplementary figure 9, 10 and 11). The whole brain  
382 images taken by commercial light-sheet microscope (UltraMicroscope, LaVision  
383 BioTec) are acquired at 1.6× and 8× magnification, which take about 20 minutes and  
384 450 minutes, respectively (Supplementary figure 14).

385

### 386 **Software**

387 The synchronization of scanning and acquisition was accomplished by LabVIEW  
388 (National Instruments). The SVR processing was implemented by customized code and  
389 computed with CUDA acceleration. The multi-view registration was processed in Fiji.  
390 The planar x-z planes of PSFs were performed using ImageJ. The 3-D rendering of  
391 PSFs were visualized by Amira (Visage Imaging). The visualizations of neuron imaging,  
392 including planar projections, 3-D renderings, neuron tracing, were performed by Imaris  
393 (Bitplane).

394

### 395 **Acknowledgements**

396 We thank Yongsheng Zhang and Weilin Zeng for technical assistance. We thank  
397 Shangbang Gao, Luoying Zhang, Haohong Li, Man Jiang, Bo Xiong for discussions  
398 and comments on the manuscript, Yunyun Han for the discussion on the imaging and  
399 brain visualization. This work was supported by the National Key R&D program of

400 China (2017YFA0700501, D.Z. and P.F.), the National Natural Science Foundation of  
401 China (21874052 for P.F., 61860206009 for D.Z.), the Innovation Fund of WNLO (P.F.  
402 and D.Z.) and the Junior Thousand Talents Program of China (P.F.).

403

#### 404 **Author contributions**

405 P.F. initiated the investigation, designed the project. J.N., S.L., Y.P., T.Y., and F.Z.  
406 developed the programs, carried out the imaging experiments and implemented  
407 quantifications. Y.L., W.M. and T.Y. prepared the samples and helped to analyze the  
408 data. P.F., D.Z., and S.Z. contributed, refined the concept and wrote the paper.

409

#### 410 **Additional information**

411 Correspondence and requests for materials should be addressed to feipeng@hust.edu.cn  
412 (P.F.) or dawnzh@mail.hust.edu.cn (D.Z.).

413

#### 414 **Conflict of interest**

415 The authors declare that they have no conflict of interest.

416

#### 417 **References**

- 418 1 Miyamichi, K. *et al.* Cortical representations of olfactory input by trans-synaptic tracing. *Nature*  
419 **472**, 191-196 (2011).
- 420 2 Lichtman, J. W. & Denk, W. The big and the small: challenges of imaging the brain's circuits.  
421 *Science* **334**, 618-623 (2011).
- 422 3 Lohmann, A. W., Dorsch, R. G., Mendlovic, D., Ferreira, C. & Zalevsky, Z. Space-bandwidth  
423 product of optical signals and systems. *JOSA A* **13**, 470-473 (1996).
- 424 4 Mendlovic, D. & Lohmann, A. W. Space-bandwidth product adaptation and its application to  
425 superresolution: fundamentals. *JOSA A* **14**, 558-562 (1997).

- 426 5 Greenbaum, A. *et al.* Increased space-bandwidth product in pixel super-resolved lensfree on-  
427 chip microscopy. *Scientific reports* **3**, 1717 (2013).
- 428 6 Mayerich, D., Abbott, L. & McCormick, B. Knife-edge scanning microscopy for imaging and  
429 reconstruction of three-dimensional anatomical structures of the mouse brain. *Journal of*  
430 *microscopy* **231**, 134-143 (2008).
- 431 7 Webb, R. H. Confocal optical microscopy. *Reports on Progress in Physics* **59**, 427 (1996).
- 432 8 Helmchen, F. & Denk, W. Deep tissue two-photon microscopy. *Nature methods* **2**, 932-940  
433 (2005).
- 434 9 Svoboda, K. & Yasuda, R. Principles of two-photon excitation microscopy and its applications  
435 to neuroscience. *Neuron* **50**, 823-839 (2006).
- 436 10 Nikolenko, V., Poskanzer, K. E. & Yuste, R. Two-photon photostimulation and imaging of  
437 neural circuits. *Nature methods* **4**, 943-950 (2007).
- 438 11 Katona, G. *et al.* Fast two-photon in vivo imaging with three-dimensional random-access  
439 scanning in large tissue volumes. *Nature methods* **9**, 201-208 (2012).
- 440 12 Economo, M. N. *et al.* A platform for brain-wide imaging and reconstruction of individual  
441 neurons. *Elife* **5** (2016).
- 442 13 Gong, H. *et al.* Continuously tracing brain-wide long-distance axonal projections in mice at a  
443 one-micron voxel resolution. *Neuroimage* **74**, 87-98 (2013).
- 444 14 Gong, H. *et al.* High-throughput dual-colour precision imaging for brain-wide connectome with  
445 cytoarchitectonic landmarks at the cellular level. *Nature communications* **7** (2016).
- 446 15 Quan, T. *et al.* NeuroGPS-Tree: automatic reconstruction of large-scale neuronal populations  
447 with dense neurites. *Nature methods* **13**, 51-54 (2016).
- 448 16 Huisken, J., Swoger, J., Del Bene, F., Wittbrodt, J. & Stelzer, E. H. Optical sectioning deep  
449 inside live embryos by selective plane illumination microscopy. *Science* **305**, 1007-1009 (2004).
- 450 17 Keller, P. J., Schmidt, A. D., Wittbrodt, J. & Stelzer, E. H. Reconstruction of zebrafish early  
451 embryonic development by scanned light sheet microscopy. *science* **322**, 1065-1069 (2008).
- 452 18 Planchon, T. A. *et al.* Rapid three-dimensional isotropic imaging of living cells using Bessel  
453 beam plane illumination. *Nat Methods* **8**, 417-423 (2011).
- 454 19 Schmid, B. *et al.* High-speed panoramic light-sheet microscopy reveals global endodermal cell  
455 dynamics. *Nature communications* **4**, 2207 (2013).
- 456 20 Keller, P. J., Ahrens, M. B. & Freeman, J. Light-sheet imaging for systems neuroscience. *nature*  
457 *methods* **12**, 27-29 (2015).
- 458 21 Guan, Z. *et al.* Compact plane illumination plugin device to enable light sheet fluorescence  
459 imaging of multi-cellular organisms on an inverted wide-field microscope. *Biomedical optics*  
460 *express* **7**, 194-208 (2016).
- 461 22 Lee, J. *et al.* 4-Dimensional light-sheet microscopy to elucidate shear stress modulation of  
462 cardiac trabeculation. *The Journal of clinical investigation* **126**, 1679 (2016).
- 463 23 Ertürk, A. *et al.* Three-dimensional imaging of solvent-cleared organs using 3DISCO. *Nature*  
464 *protocols* **7**, 1983-1995 (2012).
- 465 24 Hama, H. *et al.* ScaleS: an optical clearing palette for biological imaging. *Nature neuroscience*  
466 **18**, 1518-1529 (2015).
- 467 25 Tainaka, K. *et al.* Whole-body imaging with single-cell resolution by tissue decolorization. *Cell*  
468 **159**, 911-924 (2014).
- 469 26 Zhu, D., Larin, K. V., Luo, Q. & Tuchin, V. V. Recent progress in tissue optical clearing. *Laser*

- 470           *& photonics reviews* **7**, 732-757 (2013).
- 471 27       Yu, T., Qi, Y., Gong, H., Luo, Q. & Zhu, D. Optical clearing for multiscale biological tissues.  
472           *Journal of biophotonics* **11**, e201700187 (2018).
- 473 28       Qi, Y. *et al.* FDISCO: Advanced solvent-based clearing method for imaging whole organs.  
474           *Science advances* **5**, eaau8355 (2019).
- 475 29       Dodt, H.-U. *et al.* Ultramicroscopy: three-dimensional visualization of neuronal networks in the  
476           whole mouse brain. *Nature methods* **4**, 331 (2007).
- 477 30       Susaki, E. A. *et al.* Advanced CUBIC protocols for whole-brain and whole-body clearing and  
478           imaging. *Nature protocols* **10**, 1709-1727 (2015).
- 479 31       Tomer, R., Ye, L., Hsueh, B. & Deisseroth, K. Advanced CLARITY for rapid and high-  
480           resolution imaging of intact tissues. *Nature protocols* **9**, 1682-1697 (2014).
- 481 32       Pan, C. *et al.* Shrinkage-mediated imaging of entire organs and organisms using uDISCO.  
482           *Nature Methods* (2016).
- 483 33       Cai, R. *et al.* Panoptic imaging of transparent mice reveals whole-body neuronal projections  
484           and skull-meninges connections. Report No. 1546-1726, (Nature Publishing Group, 2018).
- 485 34       Swoger, J., Verveer, P., Greger, K., Huisken, J. & Stelzer, E. H. Multi-view image fusion  
486           improves resolution in three-dimensional microscopy. *Optics express* **15**, 8029-8042 (2007).
- 487 35       Krzic, U., Gunther, S., Saunders, T. E., Streichan, S. J. & Hufnagel, L. Multiview light-sheet  
488           microscope for rapid in toto imaging. *Nature methods* **9**, 730-733 (2012).
- 489 36       Preibisch, S., Saalfeld, S., Schindelin, J. & Tomancak, P. Software for bead-based registration  
490           of selective plane illumination microscopy data. *Nature methods* **7**, 418-419 (2010).
- 491 37       Tomer, R., Khairy, K., Amat, F. & Keller, P. J. Quantitative high-speed imaging of entire  
492           developing embryos with simultaneous multiview light-sheet microscopy. *Nature methods* **9**,  
493           755-763 (2012).
- 494 38       Chhetri, R. K. *et al.* Whole-animal functional and developmental imaging with isotropic spatial  
495           resolution. *Nat Methods* **12**, 1171-1178 (2015).
- 496 39       Liu, S. *et al.* Three-dimensional, isotropic imaging of mouse brain using multi-view  
497           deconvolution light sheet microscopy. *Journal of Innovative Optical Health Sciences* **10**,  
498           1743006 (2017).
- 499 40       Fei, P. *et al.* Subvoxel light-sheet microscopy for high-resolution high-throughput volumetric  
500           imaging of large biomedical specimens. *Advanced Photonics* **1**, 016002 (2019).
- 501 41       Preibisch, S. *et al.* Efficient Bayesian-based multiview deconvolution. *nature methods* **11**, 645-  
502           648 (2014).
- 503 42       Li, Y., Xu, J., Wan, P., Yu, T. & Zhu, D. Optimization of GFP fluorescence preservation by  
504           modified uDISCO clearing protocol. *Frontiers in neuroanatomy* **12**, 67 (2018).
- 505 43       Klein, S., Staring, M., Murphy, K., Viergever, M. A. & Pluim, J. P. Elastix: a toolbox for  
506           intensity-based medical image registration. *IEEE transactions on medical imaging* **29**, 196-205  
507           (2010).
- 508 44       Renier, N. *et al.* Mapping of brain activity by automated volume analysis of immediate early  
509           genes. *Cell* **165**, 1789-1802 (2016).
- 510 45       Yang, X. *et al.* High-throughput light sheet tomography platform for automated fast imaging of  
511           whole mouse brain. *Journal of biophotonics* **11**, e201800047 (2018).
- 512 46       Murakami, T. C. *et al.* A three-dimensional single-cell-resolution whole-brain atlas using  
513           CUBIC-X expansion microscopy and tissue clearing. *Nature neuroscience* **21**, 625 (2018).

514 47 Feng, G. *et al.* Imaging neuronal subsets in transgenic mice expressing multiple spectral variants  
515 of GFP. *Neuron* **28**, 41-51 (2000).

516 48 Becker, K. *et al.* Reduction of photo bleaching and long term archiving of chemically cleared  
517 GFP-expressing mouse brains. *PloS one* **9**, e114149 (2014).

518

519

520 **Figures and Captions**

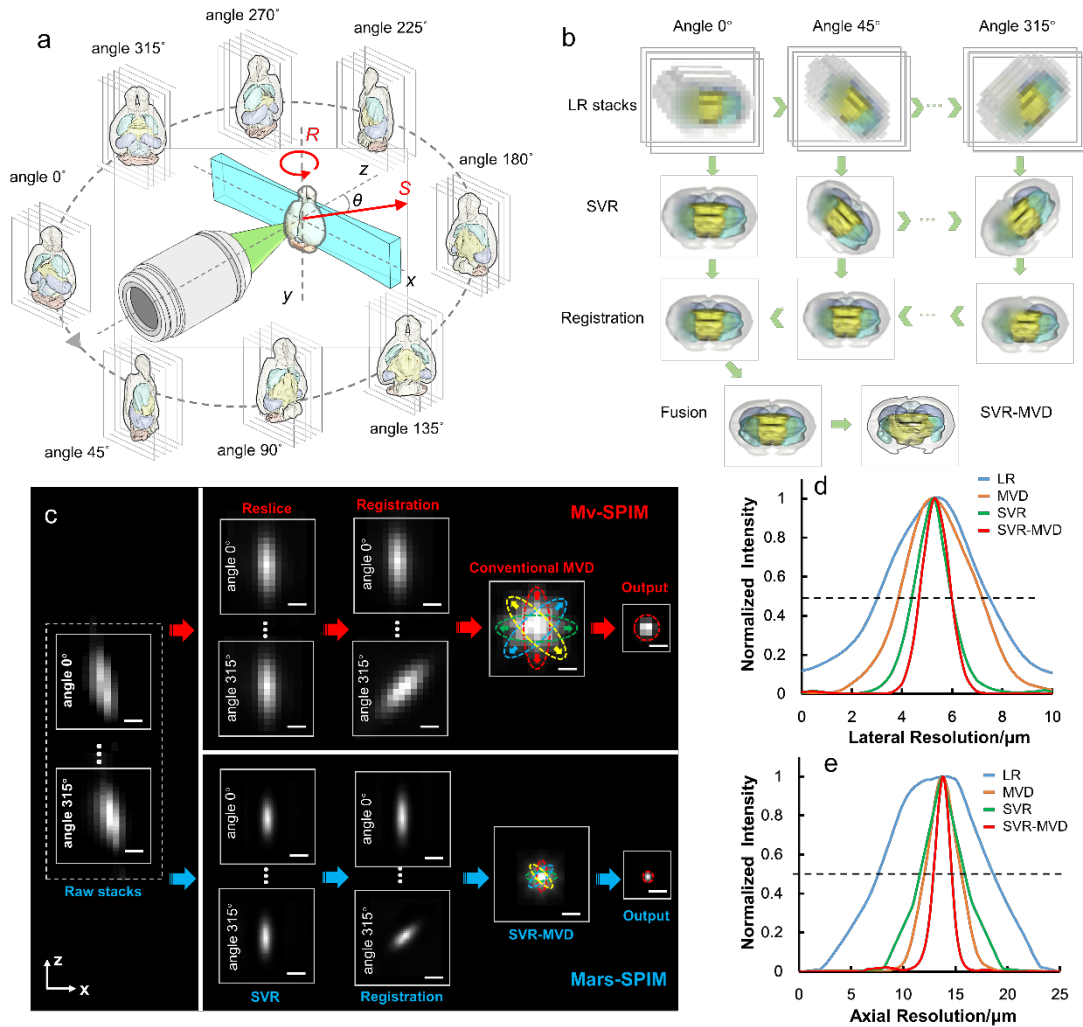

521

522 **Figure 1. Illustration and characterization of Mars-SPIM. (a)** The schematic of Mars-SPIM. A

523 low NA objective generates a relatively thick light-sheet and a low magnification objective collects

524 fluorescence with large FOV. The operation of the sample includes four degrees of freedom as: x

525 axis, y axis, non-axial direction s and rotation (along y axis). Unlike standard z-scan SPIM, here the

526 3-D scanning vector s (red) has a certain angle  $\theta$  with respect to the x, y, z axes. This off-z-axis

527 scanning strategy in conjunction with a small step size encrypts the raw image stack with lateral and

528 axial sub-voxel-size shifts, which can be used to reconstruct a resolution-enhanced volumetric

529 image via SVR procedure. To suppress the light scattering from the deep tissues and achieve

530 isotropic 3-D resolution, the whole brain sample is rotated and imaged under eight views. **(b)** The

531 work flow of SVR-MVD procedure which can *in toto* reconstruct the whole brain at isotropically  
532 enhanced resolution. It majorly includes: first, the SVR computation for multi-view, sub-voxel-  
533 scanned raw images; second, feature-based registration of SVR-processed images; and third, a  
534 Bayesian-based deconvolution that generates the final output based on multi-view SVR images. **(c)**  
535 The resolution comparison between single-view raw image, SVR only, MVD only and SVR-MVD,  
536 via resolving sub-resolution fluorescent beads (~500 nm diameter). *x-z* images show the lateral and  
537 axial extents of the resolved beads (red circles). **(d)-(e)** The intensity plots of the linecuts through  
538 the resolved beads along the lateral and axial directions, respectively. The SVR-MVD shows an  
539 obviously highest isotropic resolution at ~1.4  $\mu\text{m}$ , which is compared to ~4.2 (lateral) and 12  $\mu\text{m}$   
540 (axial) in raw image. Scale bars: 5  $\mu\text{m}$  in **(c)**.

541

542



543

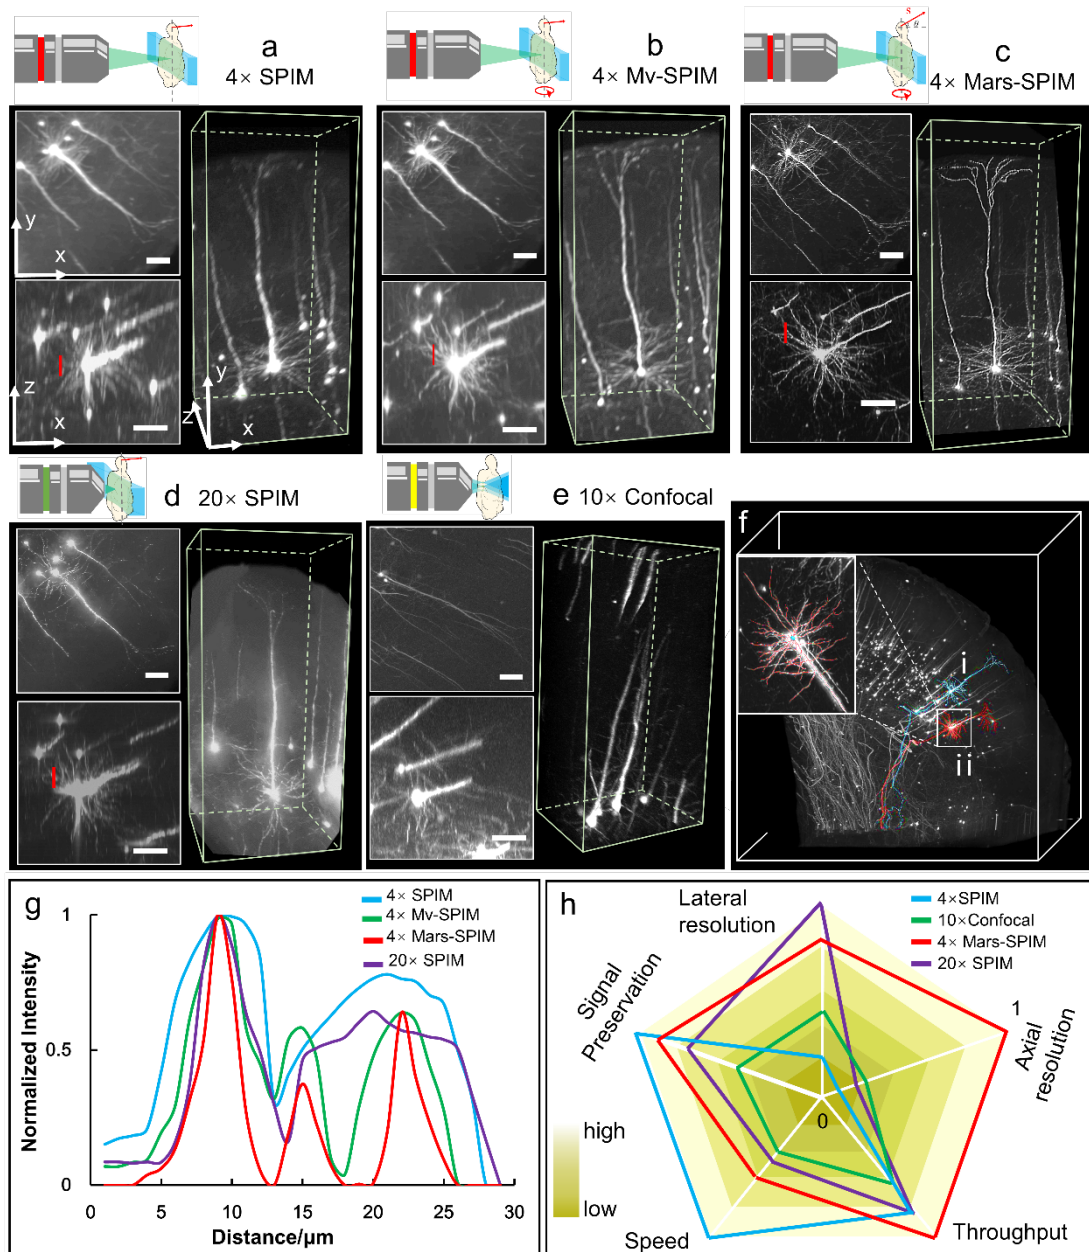

544

545 **Figure 2. Mars-SPIM demonstration on *thy1-GFP-M* brain block. (a)** Visualization of the  
 546 neurons at cortex area by conventional SPIM using 4×/0.28 objective plus a 15 μm laser-sheet. The  
 547 voxel size is 1.625 by 1.625 by 6 μm. **(b)** Conventional multiview SPIM (Mv-SPIM) results with  
 548 an isotropic voxel size of 1.625\*1.625\*1.625 μm. **(c)** The Mars-SPIM results of the same neurons,  
 549 with an isotropic reconstructed voxel size of 0.41\*0.41\*0.41 μm. **(d)** Comparison from high-  
 550 resolution SPIM using 20×/0.45 air objective plus 6.5 μm light-sheet. Due to the increasing

551 spherical aberration under higher magnification, the SNR of the images is obviously decreased. **(e)**  
552 The intensity plot of the dash lines transversely across a few neural fibers in **(a) - (d)**. It shows Mars-  
553 SPIM has the narrowest peaks which indicate highest resolving power in practice. **(f)** The SVR-  
554 MVD reconstruction of the entire brain block with size around 3 by 3 by 3 mm. As a result of finer  
555 reconstruction, two pyramidal neurons with dendrites and axons are finely segmented, shown as **(i)**  
556 and **(ii)**. **(g)** Vignette high-resolution view of the segmented neuron **(ii)** in **(f)**, showing the clearly  
557 resolved fibers. **(h)** The radar map that compares the system simplicity, imaging throughput, photo-  
558 bleaching, and spatial resolutions of four methods. The values are outputted by the logarithm and  
559 normalized. Scale bars are 50  $\mu\text{m}$  in **(a)-(e)**.

560

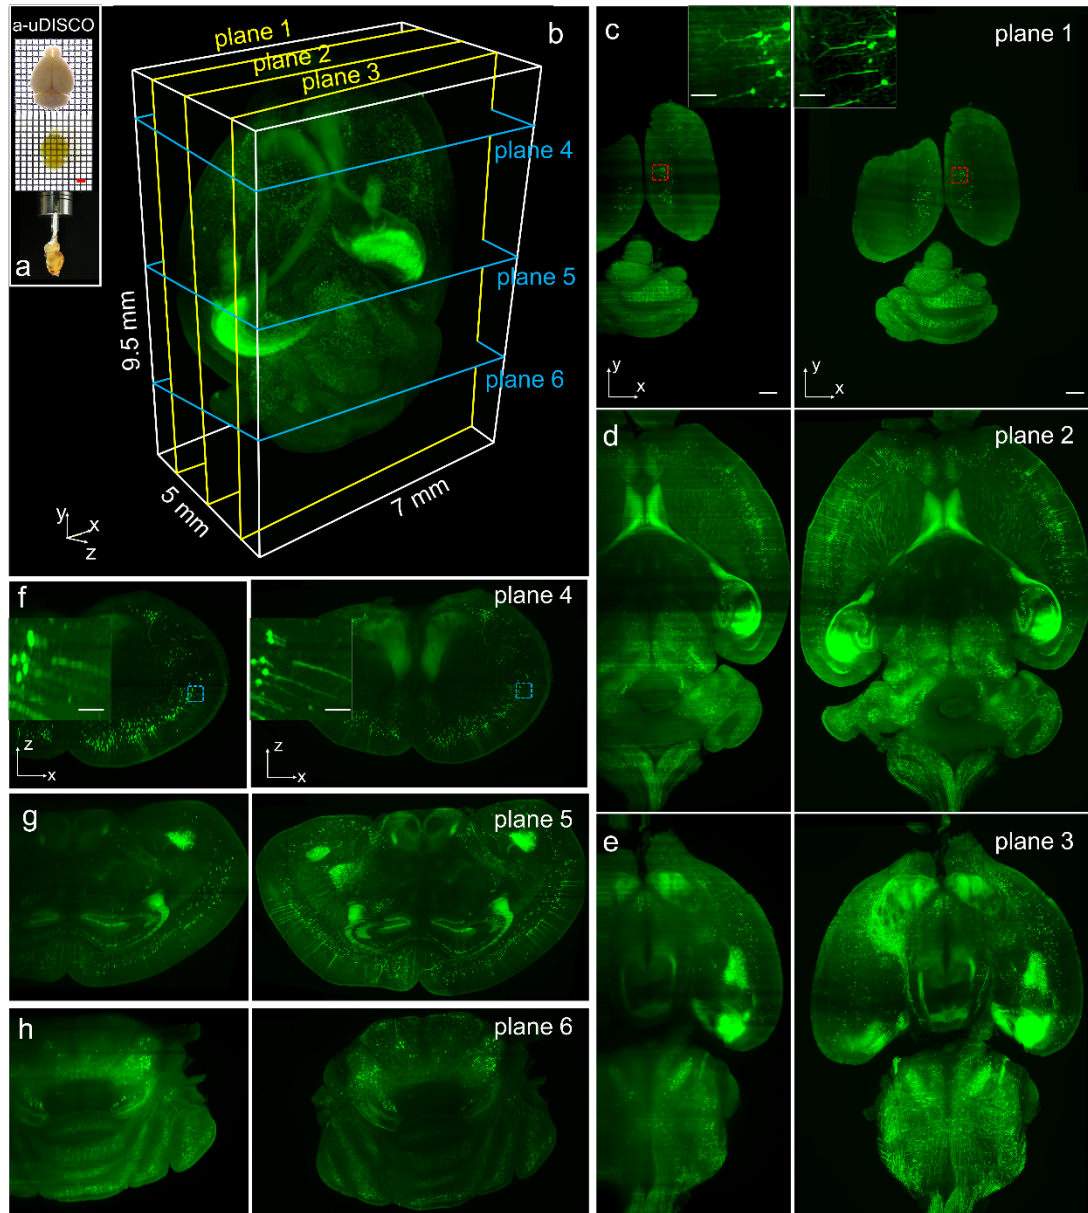

561

562 **Figure 3. Comparison of whole mouse brain image by conventional SPIM and Mars-SPIM.**

563 (a) The photographs of an adult mouse brain (8 weeks) before and after a-uDISCO clearing. (b) The

564 3D reconstruction of cleared whole mouse brain. With obtaining optically cleared brain for light-

565 sheet imaging, our Mars-SPIM system rapidly provides 3D visualization of entire brain via SVR-

566 MVD reconstruction (400 gigavoxels). Under each view, the sample is imaged using 2.2×

567 magnification plus ~25 μm laser-sheet. The sub-voxel scanning step size is ~1 μm. The final result

568 is recovered from raw images of eight views, with reconstructed isotropic voxel size of 1 by 1 by 1

569  $\mu\text{m}$ . The imaging throughput here is  $\sim 30$  minutes per whole brain, and the post-processing time is  
570  $\sim 12$  hours with employing quad NVIDIA graphical cards. **(c)-(e)** compare the transverse ( $xy$ ) planes  
571 at 500, 2500 and 4000  $\mu\text{m}$  z-depth, by conventional SPIM and Mars-SPIM. Mar-SPIM shows more  
572 uniform image quality at the deep of tissue. **(f)-(h)** correspondingly compare the reconstructed  
573 coronal ( $xz$ ) planes at the height of 1500, 4000 and 8000  $\mu\text{m}$ . The completely blurred parts by tissue  
574 scattering/attenuation are discarded in conventional SPIM images. Besides the reconstruction  
575 integrity of whole brain, the insets in **(c)-(e)** and **(f)-(g)** further compares the achieved lateral and  
576 axial resolutions of regular SPIM images and Mars-SPIM images with using the same optics. Scale  
577 bars: 500  $\mu\text{m}$  in **(b)-(g)** and 100  $\mu\text{m}$  in insets.  
578

579

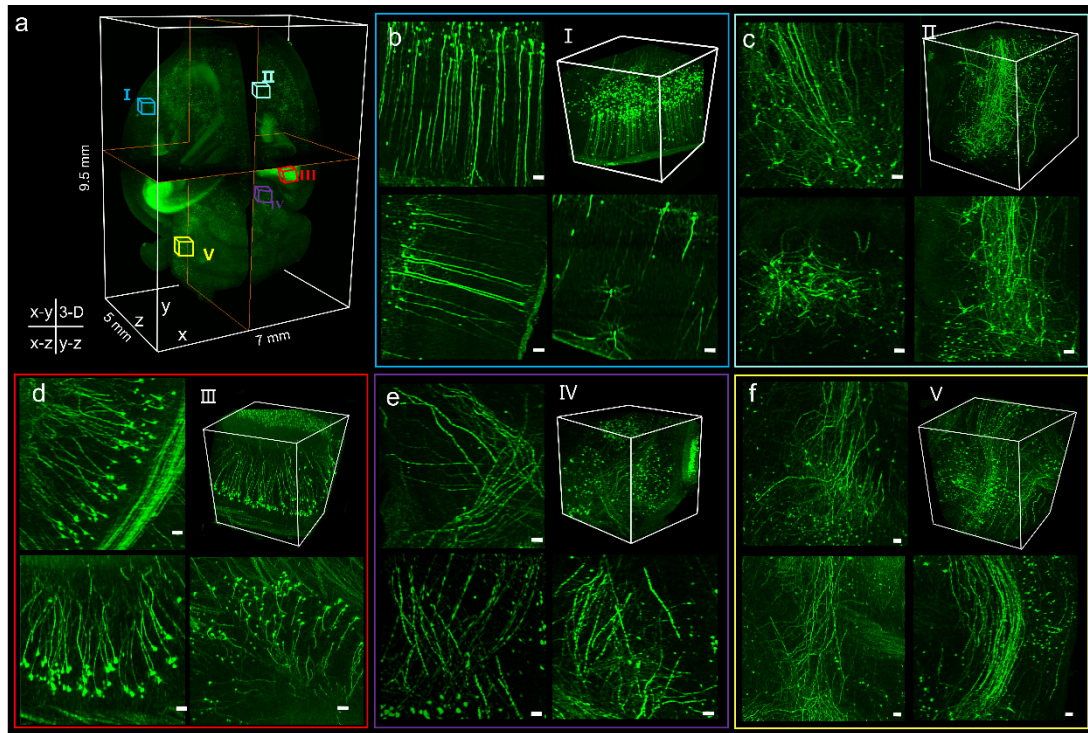

580

581 **Figure 4. High-throughput, whole-brain imaging at isotropic cellular resolution using Mars-**  
582 **SPIM. (a)** The reconstructed whole mouse brain by Mars-SPIM. Five selected volumes (**I-V**) at left  
583 cortex (blue), right cortex (cyan), hippocampus (red), thalamus (purple) and cerebellum (yellow)  
584 are shown in **(b)-(f)**, respectively, with each one containing the transverse (x-y), sagittal (y-z),  
585 coronal (x-z) planes and 3-D rendering of the selected volume. The neuronal cell bodies together  
586 with the projecting fibers can be identified as a result of significantly enhanced resolutions by Mars-  
587 SPIM. Scale bars: 20  $\mu\text{m}$  in **(b)-(f)**.

588

589

590

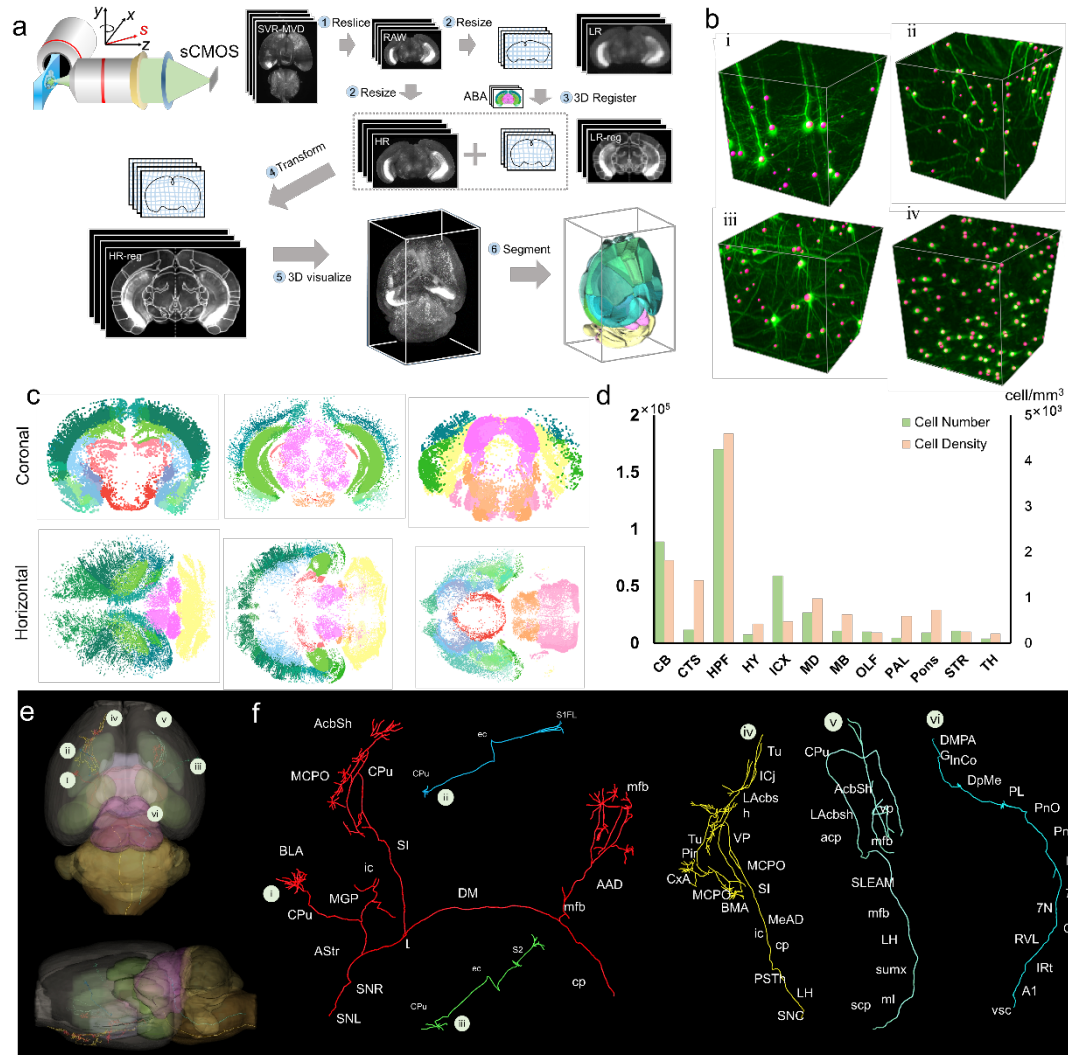

591

592 **Figure 5. Quantifications of a *thy1-GFP-M* mouse brain based on Mars-SPIM image. (a)**

593 quick creation of whole brain atlas. Step 1: re-orientation of the Mars-SPIM image from horizontal

594 to coronal view and pre-alignment to standard Allen brain atlas (ABA) using Elastix. Step 2: resizing

595 the pre-aligned coronal images into low-resolution (LR) and high-resolution (HR) groups. Step 3:

596 registration of LR group to ABA to obtain the transformation matrix. Step 4: Application of the

597 transformation matrix to HR group to obtain the registered HR images. Step 5: 3D visualization of

598 the ABA-registered brain. Step 6: Segmentation of the brain regions in Amira. (b) With isotropic

599 single-cell resolution at whole-brain scale, 3D detection of single neurons can be readily achieved

600 at various brain regions. As a result, the neuron distribution at different regions of the whole brain

601 can be mapped out, as shown in the coronal and transverse views in (c). Each color represents a  
602 brain region. **(d)** The neuron population and density calculated at 12 primary brain regions. CB,  
603 cerebellum; CTS, cortical subplate; HPF, hippocampal formation; HY, hypothalamus; ICX,  
604 isocortex; MD, medulla; MB, midbrain; OFL, Olfactory areas; PAL, pallidum; Pons, pons; STR,  
605 striatum; TH, thalamus. **(e)** Horizontal and coronal views of the traced neuron long-distance  
606 projections shown in volumetric rendering. **(f)** The pathway annotations of 6 long-distance  
607 projection neurons. Abbreviations: AAD, anterior amygdaloid area, dorsal part; Acbsh, accumbens  
608 nucleus, shell; Astr, amygdalostriatal transition area; BLA, basolateral amygdaloid nucleus, anterior  
609 part; cp, CPu, caudate putamen (striatum); DM, ic, LH, lateral hypothalamic area; MCPO,  
610 magnocellular preoptic nucleus; mfb, medial forebrain bundle; MGP, medial globus pallidus  
611 (entopeduncular nucleus); SI SNL, substantia nigra, lateral part; SNR, substantia nigra, reticular  
612 part; Tu, olfactory tubercle; ICj, islands of Calleja; LAcbsh, lateral amygdaloid nucleus; VP, ventral  
613 pallidum; Pir, piriform cortex; CxA, cortex-amygdala transition zone; MCPO, magnocellular  
614 preoptic nucleus; SI, substantia innominate; BMA, basomedial amygdaloid nucleus, anterior part;  
615 MeAD, medial amygdaloid nucleus, anterior dorsal; ic, internal capsule; cp, cerebral peduncle, basal  
616 part; PSTh, parasubthalamic nucleus; LH, lateral hypothalamic area; SNC, substantia nigra,  
617 compact part; vsc, ventral spinocerebellar tract; A1, A1 noradrenaline cells; IRt, intermediate  
618 reticular nucleus; RVL, rostroventrolateral reticular nucleus; C1, C1 adrenaline cells; 7N, facial  
619 nucleus; 7DI, facial nucleus, dorsal intermediate subnucleus; PnC, pontine reticular nucleus, caudal  
620 part; PnO, pontine reticular nucleus, oral part; PL, paralemniscal nucleus; DpMe, deep  
621 mesencephalic nucleus; InCo, intercollicular nucleus; DMPAG, dorsomedial periaqueductal gray;  
622 S1FL, primary somatosensory cortex, forelimb region; CPu, caudate putamen; ec, external capsule;

623 S2, secondary somatosensory cortex; scp, superior cerebellar peduncle; ml, medial lemniscus; sumx,

624 supramammillary decussation; LH, lateral hypothalamic area; mfb, medial forebrain bundle;

625 SLEAM, sublenticular extended amygdala, medial part; acp, anterior commissure, posterior; AcbSh,

626 accumbens nucleus, shell; vp, ventral pallidum;

627

628

629
